# Supplementary material for: High efficiency Mg2(Si,Sn)-based thermoelectric materials: scale-up synthesis, functional homogeneity, and thermal stability
Source: Royal Society of Chemistry journal article supplement (doi:10.1039/c9ra04800f), 2019-01-01
Supplement: c9ra04800f1.pdf [file c9ra04800f1.pdf]

## High efficiency $\text{Mg}_2(\text{Si}, \text{Sn})$ based thermoelectric materials: scale-up synthesis, functional homogeneity, and thermal stability

Nader Farahi \*, Christian Stiewe, D. Y. Nhi Truong, Johannes de Boor, and Eckhard Müller

<sup>a</sup>Institute of Materials Research, German Aerospace Center (DLR), D-51170 Köln, Germany, nfarahi@uwaterloo.ca

<sup>b</sup>Institute of Inorganic and Analytical Chemistry, Justus Liebig University Gießen, D-35392 Gießen, Germany

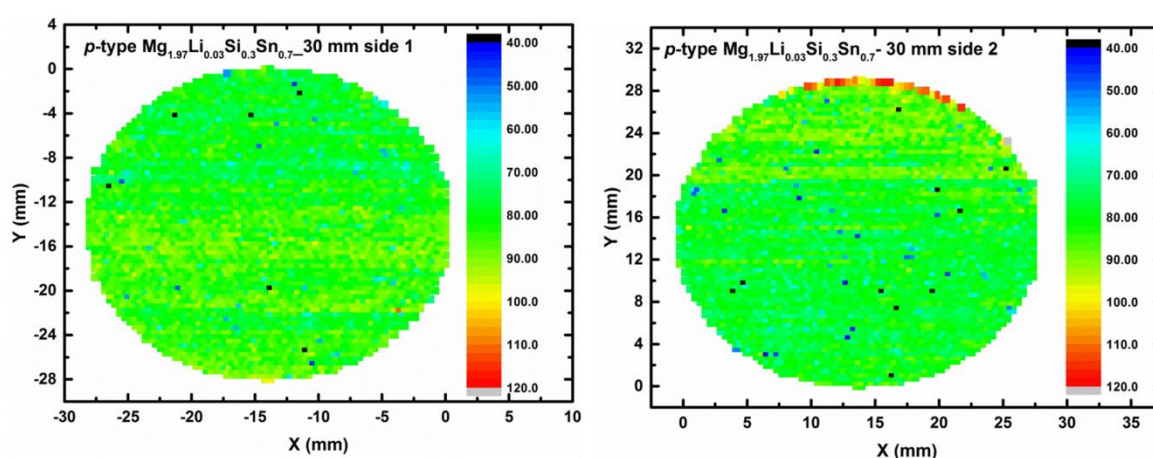

Fig. S1. Surface Seebeck scans of both base faces of the Ø30 mm  $\text{Mg}_{1.97}\text{Li}_{0.03}\text{Si}_{0.3}\text{Sn}_{0.7}$  pellet (error 5%).

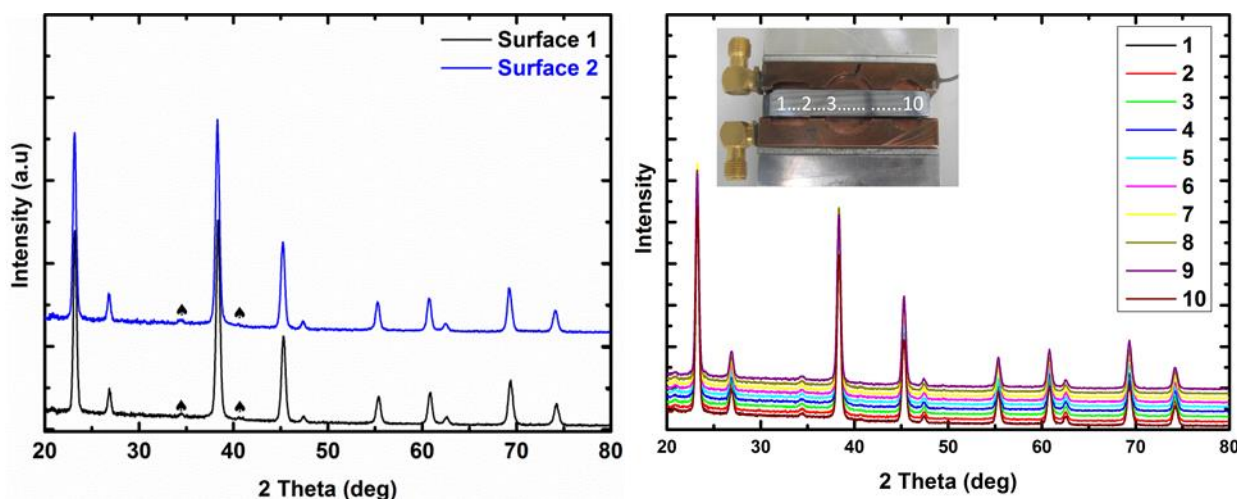

Fig. S2. X-ray diffraction patterns on the both surfaces and the cross section (left) and ten different points on cross section (right) of the Ø50 mm  $\text{Mg}_2\text{Si}_{0.3}\text{Sn}_{0.675}\text{Bi}_{0.025}$  sample.

Table S1. Density and calculated specific heat of four samples extracted from the Ø50 mm pellet.

| Sample | Density ( $\text{g}\cdot\text{cm}^{-3}$ )<br>(Archimedes method) | Specific Heat ( $\text{J}\cdot\text{g}^{-1}\cdot\text{K}^{-1}$ )<br>(Dulong-Petit approximation) |
|--------|------------------------------------------------------------------|--------------------------------------------------------------------------------------------------|
| I      | 3.11 (> 98% theoretical density)                                 | 0.514                                                                                            |
| II     | 3.14 (> 98% theoretical density)                                 | 0.514                                                                                            |
| III    | 3.13 (> 98% theoretical density)                                 | 0.514                                                                                            |
| IV     | 3.14 (> 98% theoretical density)                                 | 0.514                                                                                            |

Table S2. Density and calculated specific heat of three samples extracted from the Ø70 mm pellet.

| Sample | Density ( $\text{g}\cdot\text{cm}^{-3}$ )<br>(Archimedes method) | Specific Heat ( $\text{J}\cdot\text{g}^{-1}\cdot\text{K}^{-1}$ )<br>(Dulong-Petit approximation) |
|--------|------------------------------------------------------------------|--------------------------------------------------------------------------------------------------|
| I      | 3.15 (> 98% theoretical density)                                 | 0.514                                                                                            |
| II     | 3.14 (> 98% theoretical density)                                 | 0.514                                                                                            |
| III    | 3.13 (> 98% theoretical density)                                 | 0.514                                                                                            |

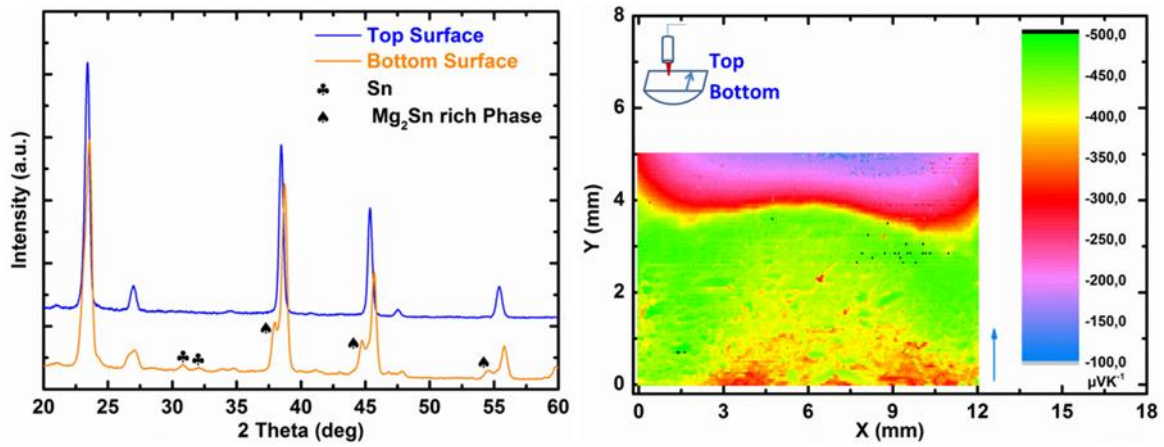

Fig. S3. X-ray diffraction patterns on the top and bottom surfaces (left) and surface Seebeck scan on cross section (right) of the  $\text{Mg}_2\text{Si}_{0.3}\text{Sn}_{0.675}\text{Bi}_{0.025}$  sample with current passing through the sample.

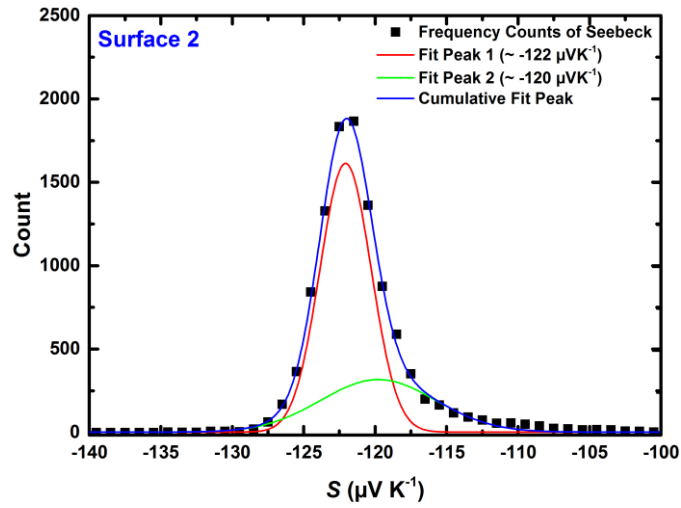

Fig. S4. Frequency count of surface Seebeck scan performed on one of the two surfaces of the  $\text{Ø}50 \text{ mm Mg}_2\text{Si}_{0.3}\text{Sn}_{0.675}\text{Bi}_{0.025}$  sample.

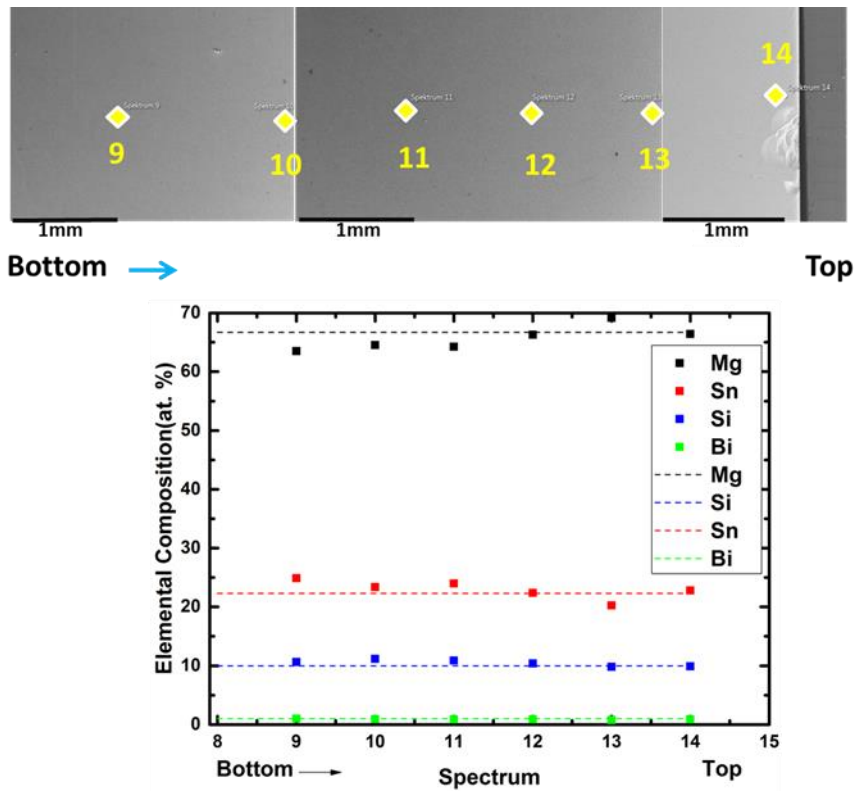

Fig. S5. SEM image (top) together with EDX analysis (bottom) along the cross section of the  $\text{Ø}50 \text{ mm Mg}_2\text{Si}_{0.3}\text{Sn}_{0.675}\text{Bi}_{0.025}$  sample. The dash lines represent the nominal compositions.

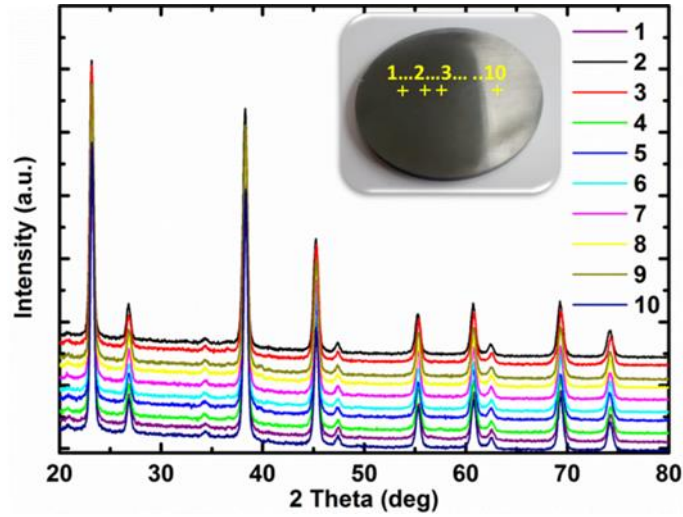

Fig. S6. XRD patterns on the surface of the  $\varnothing 70$  mm  $\text{Mg}_2\text{Si}_{0.3}\text{Sn}_{0.675}\text{Bi}_{0.025}$  sample.

Table S3. Thermoelectric properties of three samples extracted from the  $\varnothing 70$  mm pellet before and after heat treatment at  $\sim 773$  K.

| Thermoelectric properties              | 1 (168 h) | 2 (336 h) | 3 (720 h) |
|----------------------------------------|-----------|-----------|-----------|
| $\sigma/(\Omega^{-1}\text{cm}^{-1})^*$ | 1051/1049 | 1025/1000 | 1020/997  |
| $S/(\mu\text{V K}^{-1})^*$             | -198/-201 | -198/-201 | -198/-209 |

\*properties compared at 773 K, before annealing/ after annealing.

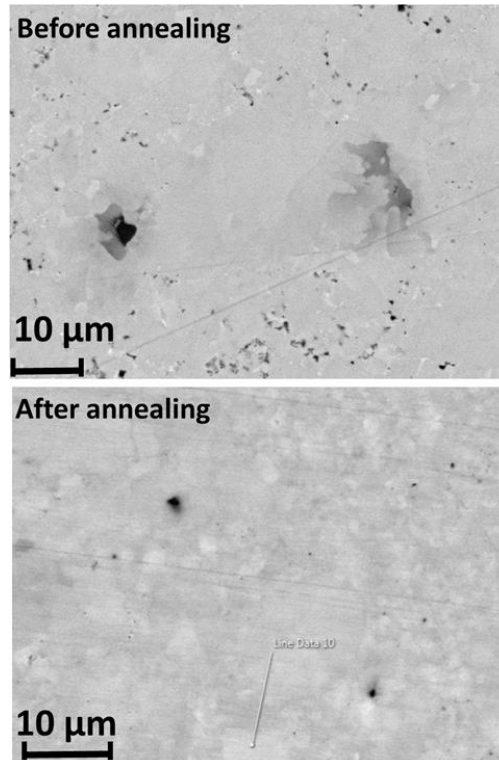

Fig. S7. SEM image of the sample (top) before and (bottom) after heat treatment at 723 K for 720 hours.
